# Supplementary material for: Association of Periaortic Fat and Abdominal Visceral Fat with Coronary Artery Atherosclerosis in Chinese Middle Aged and Elderly Patients Undergoing Computed Tomography Coronary Angiography
Source: PubMed Central journal article supplement (PMC8533656; doi:10.5334/gh.1078), 2021-10-19
Supplement: gh-16-1-1078-s1.pdf [file gh-16-1-1078-s1.pdf]

## Supplement

**Supplement Table 1: Intraclass correlation of inter-observer agreement for body fat measurement.**

| <b>Parameter</b>       | <b>ICC</b> |
|------------------------|------------|
| VATA, cm <sup>2</sup>  | 0.968      |
| SATA, cm <sup>2</sup>  | 1          |
| VATV, cm <sup>3</sup>  | 1          |
| SATV, cm <sup>3</sup>  | 1          |
| PAFV, cm <sup>3</sup>  | 0.998      |
| EFV, cm <sup>3</sup>   | 0.999      |
| PaCFV, cm <sup>3</sup> | 0.999      |

Abbreviations: ICC, intraclass correlation; VATA, visceral adipose tissue area, cm<sup>2</sup>; SATA, subcutaneous adipose tissue area, cm<sup>2</sup>; VATV, visceral adipose tissue volume, cm<sup>3</sup>; SATV, subcutaneous adipose tissue volume, cm<sup>3</sup>; PAFV, periaortic fat volume, cm<sup>3</sup>; EFV, epicardial fat volume, cm<sup>3</sup>; PaCFV, paracardial fat volume, cm<sup>3</sup>.

**Supplement Table 2: The clinical characteristics and ectopic fat distribution of participants aged 50 years and over.**

| Age                           | All                 | Men                 | Women               | p-value |
|-------------------------------|---------------------|---------------------|---------------------|---------|
|                               | n=750               | n=378               | n=372               |         |
| Gender, %                     |                     | 50.4                | 49.6                |         |
| Age, years                    | 64.8 (64.2-65.3)    | 64.2 (63.5-65.0)    | 65.3 (64.6-66.0)    | 0.057   |
| CAD, % (n)                    | 57.2 (429)          | 68.5 (259)          | 45.7 (170)          | < 0.001 |
| Obstructive CAD, % (n)        | 22.7 (170)          | 32.3 (122)          | 12.9 (48)           | < 0.001 |
| CAC score                     | 131.4 (98.9-163.8)  | 201.2 (144.4-258.0) | 60.4 (31.2-89.7)    | < 0.001 |
| Overweight, % (n)             | 43.3 (324)          | 47.2 (178)          | 39.2 (146)          | 0.001   |
| Obesity, % (n)                | 13.2 (99)           | 15.4 (58)           | 11.0 (41)           | 0.002   |
| Diabetes, % (n)               | 20.8 (156)          | 23.8 (90)           | 17.7 (66)           | 0.025   |
| Hypertension, % (n)           | 63.2 (474)          | 65.3 (247)          | 61.0 (227)          | 0.227   |
| Current smoking, % (n)        | 23.9 (179)          | 44.7 (169)          | 2.7 (10)            | < 0.001 |
| Statin, % (n)                 | 12.5 (94)           | 13.8 (52)           | 11.3 (42)           | 0.323   |
| HTN med, % (n)                | 43.6 (327)          | 46.6 (176)          | 40.6 (151)          | 0.106   |
| DM med, % (n)                 | 10.0 (75)           | 13.2 (50)           | 6.7 (25)            | 0.003   |
| BMI, kg/m <sup>2</sup>        | 24.6 (24.2-24.8)    | 25.0 (24.7-25.8)    | 24.2 (23.8-24.5)    | < 0.001 |
| SBP, mmHg                     | 133.1 (131.9-134.3) | 132.5 (131.0-134.1) | 133.6 (131.8-135.5) | 0.373   |
| <b>Ectopic fat deposition</b> |                     |                     |                     |         |
| WC, cm                        | 90.4 (89.7-91.1)    | 90.9 (90.0-91.9)    | 89.8 (88.7-90.8)    | 0.105   |
| VATA, cm <sup>2</sup>         | 128.3 (124.4-132.3) | 143.4 (137.2-149.6) | 113.6 (109.1-118.0) | < 0.001 |
| SATA, cm <sup>2</sup>         | 186.8 (180.6-193.0) | 156.6 (149.9-163.3) | 216.6 (207.2-226.0) | < 0.001 |
| VATV, cm <sup>3</sup>         | 2369 (2281-2456)    | 2673 (2540-2806)    | 2070 (1964-2176)    | < 0.001 |
| SATV, cm <sup>3</sup>         | 2302 (2193-2410)    | 1969 (1860-2077)    | 2628 (2447-2808)    | < 0.001 |
| LSR                           | 1.25 (1.24-1.27)    | 1.23 (1.20-1.26)    | 1.28 (1.25-1.30)    | 0.007   |
| Fatty liver, % (n)            | 21.5 (161)          | 23.5 (89)           | 19.4 (72)           | 0.095   |
| PAFV, cm <sup>3</sup>         | 17.7 (17.0-18.4)    | 22.4 (21.4-23.5)    | 12.8 (12.2-13.4)    | < 0.001 |
| EFV, cm <sup>3</sup>          | 48.2 (45.9-50.4)    | 59.4 (55.7-63.0)    | 36.8 (34.8-38.9)    | < 0.001 |
| PaCFV, cm <sup>3</sup>        | 78.9 (76.4-81.4)    | 81.0 (77.4-84.5)    | 76.8 (73.4-80.2)    | 0.097   |
| <b>Laboratory parameters</b>  |                     |                     |                     |         |
| FG, mmol/L                    | 5.85 (5.70-5.00)    | 5.95 (5.73-6.17)    | 5.75 (5.55-5.94)    | 0.176   |
| HbA1c, %                      | 6.00 (5.94-6.07)    | 6.04 (5.94-6.17)    | 5.96 (5.55-5.94)    | 0.238   |
| Triglyceride, mmol/L          | 1.94 (1.85-2.03)    | 2.10 (1.95-2.26)    | 1.78 (1.67-1.88)    | 0.001   |
| HDL-C, mmol/L                 | 1.37 (1.34-1.40)    | 1.22 (1.18-1.25)    | 1.52 (1.48-1.58)    | < 0.001 |
| LDL-C, mmol/L                 | 3.14 (3.07-3.21)    | 3.03 (2.93-3.12)    | 3.26 (3.16-3.35)    | 0.001   |

Data are presented as mean (95% confidence interval, CI) for continuous and % (numbers, n) for categorical characteristics. Abbreviations: CAD, coronary artery disease; CAC score, coronary artery calcium score; BMI, body mass index, kg/m<sup>2</sup>; meds, medications; SBP, systolic blood pressure, mmHg; WC, waist circumference, cm; VATA, visceral adipose tissue area, cm<sup>2</sup>; SATA, subcutaneous adipose tissue area, cm<sup>2</sup>; VATV, visceral adipose tissue volume, cm<sup>3</sup>; SATV, subcutaneous adipose tissue volume, cm<sup>3</sup>; LSR, liver-to-spleen attenuation ratio; PAFV, periaortic fat volume, cm<sup>3</sup>; EFV, epicardial fat volume, cm<sup>3</sup>; PaCFV, paracardial fat volume, cm<sup>3</sup>; FG, fast glucose, mmol/L; HbA1c, hemoglobin A1c, %; HDL-C, high-density lipoprotein cholesterol, mmol/L; LDL-C, low-density lipoprotein cholesterol, mmol/L.

**Supplement Table 3: Body ectopic fat deposition in men and women with or without coronary artery disease.**

|                               | Men 378           |                      | p-value | Women 372         |                       | p-value |
|-------------------------------|-------------------|----------------------|---------|-------------------|-----------------------|---------|
|                               | no CAD-CA (n=119) | CADmsCA/mmCA (n=259) |         | no CAD-CA (n=202) | CAD msCA/mmCA (n=170) |         |
| Age, years                    | 61.6 (60.4-62.9)  | 65.5 (64.7-66.4)     | <0.001  | 63.4 (62.5-64.2)  | 67.5 (66.5-68.6)      | <0.001  |
| CAD, % (n)                    |                   | 68.6 (259)           |         |                   | 45.7 (170)            |         |
| Obstructive CAD, % (n)        |                   | 34.1 (129)           |         |                   | 12.6 (47)             |         |
| CAC score                     | 0                 | 293.7 (213-374)      | <0.001  | 0                 | 132.2 (69-194)        | <0.001  |
| Overweight, % (n)             | 40.3 (48)         | 50.2 (130)           | 0.075   | 34.1 (69)         | 45.3 (77)             | 0.041   |
| Obesity, % (n)                | 15.9 (19)         | 15.1 (39)            | 0.335   | 11.9 (24)         | 10.0 (17)             | 0.247   |
| Diabetes, % (n)               | 16.8 (20)         | 27.0 (70)            | 0.019   | 11.4 (23)         | 25.3 (43)             | <0.001  |
| Hypertension, % (n)           | 52.9 (63)         | 71.0 (184)           | 0.001   | 52.0 (105)        | 71.8 (122)            | <0.001  |
| Smokers, % (n)                | 47.9 (57)         | 43.2 (112)           | 0.231   | 3.0 (6)           | 2.3 (4)               | 0.486   |
| Statin use, % (n)             | 6.7 (8)           | 17.0 (44)            | 0.004   | 6.9 (14)          | 16.5 (28)             | 0.003   |
| HTN med, % (n)                | 32.8 (39)         | 52.9 (137)           | <0.001  | 32.2 (65)         | 50.6 (86)             | <0.001  |
| DM med, % (n)                 | 8.4 (10)          | 15.4 (40)            | 0.040   | 2.5 (5)           | 11.8 (20)             | <0.001  |
| SBP, mmHg                     | 126.7 (124-129)   | 135.2 (133-137)      | <0.001  | 129.2 (126-131)   | 138.9 (136-141)       | <0.001  |
| BMI, kg/m <sup>2</sup>        | 24.8 (24.2-25.4)  | 25.1 (24.8-25.5)     | 0.380   | 24.0 (23.5-24.5)  | 24.3 (23.8-24.8)      | 0.406   |
| WC, cm                        | 89.6 (87.9-91.4)  | 91.5 (90.4-92.7)     | 0.072   | 88.6 (87.2-90.0)  | 91.2 (89.6-92.8)      | 0.014   |
| <b>Ectopic fat deposition</b> |                   |                      |         |                   |                       |         |
| VATA, cm <sup>2</sup>         | 141.6 (130-152)   | 144.2 (1436-151)     | 0.710   | 107.9 (101-114)   | 120.1 (113-126)       | 0.008   |
| SATA, cm <sup>2</sup>         | 153.7 (141-165)   | 157.9 (149-166)      | 0.567   | 213.0 (198-227)   | 220.9 (209-232)       | 0.409   |
| VATV, cm <sup>3</sup>         | 2663 (2425-2900)  | 2678 (2517-2839)     | 0.918   | 1897 (1759-2035)  | 2271 (2112-2431)      | <0.001  |
| SATV, cm <sup>3</sup>         | 1829 (1660-1999)  | 2030 (1893-2167)     | 0.093   | 2508 (2337-2680)  | 2767 (2429-3105)      | 0.160   |
| LSR                           | 1.27 (1.21-1.32)  | 1.21 (1.18-1.22)     | 0.049   | 1.29 (1.26-1.32)  | 1.26 (1.23-1.30)      | 0.199   |
| Fatty liver, % (n)            | 25.2 (30)         | 22.8 (59)            | 0.337   | 15.3 (31)         | 24.1 (41)             | 0.021   |
| PAFV, cm <sup>3</sup>         | 20.7 (18.9-22.5)  | 23.3 (21.9-24.6)     | 0.031   | 11.7 (10.9-12.4)  | 14.2 (13.2-15.1)      | <0.001  |
| EFV, cm <sup>3</sup>          | 58.5 (51.5-65.6)  | 59.7 (55.5-64.0)     | 0.765   | 34.1 (31.4-36.9)  | 40.1 (37.1-43.1)      | 0.005   |
| PaCFV, cm <sup>3</sup>        | 77.6 (71.6-83.6)  | 82.5 (78.1-86.9)     | 0.214   | 72.3 (67.6-77.1)  | 82.2 (77.5-86.9)      | 0.004   |
| <b>Laboratory parameters</b>  |                   |                      |         |                   |                       |         |
| FG, mmol/L                    | 5.45 (5.17-5.74)  | 6.17 (5.88-6.46)     | 0.003   | 5.46 (5.26-5.66)  | 6.08 (5.73-6.43)      | 0.002   |
| HbA1c, %                      | 5.76 (5.58-5.93)  | 6.17 (6.04-6.31)     | <0.001  | 5.88 (5.78-5.97)  | 6.07 (5.94-6.20)      | 0.017   |
| Triglyceride, mmol/L          | 2.04 (1.76-2.33)  | 2.13 (1.95-2.31)     | 0.614   | 1.71 (1.57-1.86)  | 1.85 (1.69-2.01)      | 0.210   |
| HDL-C, mmol/L                 | 1.24 (1.17-1.31)  | 1.20 (1.16-1.25)     | 0.355   | 1.54 (1.48-1.59)  | 1.50 (1.43-1.56)      | 0.345   |
| LDL-C, mmol/L                 | 2.97 (2.87-3.08)  | 3.14 (2.94-3.33)     | 0.101   | 2.91 (2.78-3.05)  | 3.08 (2.96-3.20)      | 0.112   |

Data are presented as mean (95% confidence interval, CI) for continuous and % (numbers, n) for categorical characteristics.

Abbreviations: CAD-CA, coronary artery atherosclerosis; CAD-msCA, CAD moderate to severe coronary atherosclerosis; CAD-mmCA, CAD minimal to mild coronary atherosclerosis; BMI, body mass index, kg/m<sup>2</sup>; WC, waist circumference, cm; VATA, visceral adipose tissue area, cm<sup>2</sup>; SATA, subcutaneous adipose tissue area, cm<sup>2</sup>; VATV, visceral adipose tissue volume, cm<sup>3</sup>; SATV, subcutaneous adipose tissue volume, cm<sup>3</sup>; LSR, liver-to-spleen attenuation ratio; PAFV, periaortic fat volume, cm<sup>3</sup>; EFV, epicardial fat volume, cm<sup>3</sup>; PaCFV, paracardial fat volume, cm<sup>3</sup>; SBP, systolic blood pressure, mmHg; FG, fast glucose, mmol/L; HbA1c, hemoglobin A1c, %; HDL-C, high-density lipoprotein cholesterol, mmol/L; LDL-C, low-density lipoprotein cholesterol, mmol/L.

**Supplement Table 4: Body ectopic fat deposition in men and women with or without coronary artery atherosclerosis.**

|                   | Men 378              |                  | p-value | Women 372            |                  | p-value |
|-------------------|----------------------|------------------|---------|----------------------|------------------|---------|
|                   | No/ CAD-mmCA (n=256) | CAD-msCA (n=122) |         | No/ CAD-mmCA (n=324) | CAD-msCA (n=48)  |         |
| Age, years        | 63.0 (62.1-63.9)     | 66.7 (65.4-68.0) | <0.001  | 64.7 (64.0-65.5)     | 69.0 (66.9-71.1) | <0.001  |
| CAD, % (n)        |                      | 34.1 (129)       |         |                      | 12.6 (47)        |         |
| CAC score         | 16.1 (7.4-24.8)      | 558 (410-706)    | <0.001  | 9.3 (5.4-13.2)       | 413.8 (204-623)  | <0.001  |
| Overweight, % (n) | 46.8 (116)           | 48.1 (62)        | 0.416   | 37.5 (122)           | 51.1 (24)        | 0.044   |

|                               |                  |                  |        |                  |                   |        |
|-------------------------------|------------------|------------------|--------|------------------|-------------------|--------|
| Obesity, % (n)                | 13.3 (33)        | 19.4 (25)        | 0.063  | 11.1 (36)        | 10.6 (5)          | 0.520  |
| Diabetes, % (n)               | 20.1 (50)        | 31.1 (40)        | 0.013  | 14.8 (48)        | 38.3 (18)         | <0.001 |
| Hypertension, % (n)           | 60.2 (150)       | 75.2 (97)        | 0.002  | 59.4 (193)       | 72.3 (34)         | 0.050  |
| Current smoking, % (n)        | 48.6 (121)       | 37.2 (48)        | 0.022  | 2.8 (9)          | 2.1 (1)           | 0.633  |
| Statin use, % (n)             | 10.0 (25)        | 20.9 (27)        | 0.003  | 9.8 (32)         | 21.3 (10)         | 0.025  |
| HTN med, % (n)                | 39.0 (97)        | 61.2 (79)        | <0.001 | 38.5 (125)       | 55.3 (26)         | 0.021  |
| DM med, % (n)                 | 10.0 (25)        | 19.4 (25)        | 0.010  | 4.9 (16)         | 19.1 (9)          | 0.002  |
| SBP, mmHg                     | 130.1 (128-131)  | 137.4 (134-140)  | <0.001 | 132.6 (130-134)  | 140.0 (136-145)   | 0.004  |
| BMI, kg/m <sup>2</sup>        | 24.8 (24.4-25.2) | 25.5 (24.9-26.1) | 0.057  | 24.1 (23.7-24.4) | 24.8 (23.9-25.6)  | 0.171  |
| WC, cm                        | 89.8 (88.6-91.0) | 93.1 (91.5-94.8) | 0.001  | 89.5 (88.4-90.7) | 91.5 (89.1-93.8)  | 0.222  |
| <b>Ectopic fat deposition</b> |                  |                  |        |                  |                   |        |
| VATA, cm <sup>2</sup>         | 136.3 (128-143)  | 156.3 (146-166)  | 0.002  | 110.9 (106-115)  | 132.5 (117-147)   | 0.002  |
| SATA, cm <sup>2</sup>         | 151.3 (143-159)  | 166.3 (154-178)  | 0.055  | 213.5 (203-223)  | 239.2 (220-257)   | 0.078  |
| VATV, cm <sup>3</sup>         | 2558 (2396-2720) | 2884 (2656-3112) | 0.021  | 1999 (1889-2109) | 2585 (2517-3272)  | <0.001 |
| SATV, cm <sup>3</sup>         | 1877 (1750-2004) | 2137 (1938-2336) | 0.054  | 2595 (2396-2795) | 2854 (2477-3231)  | 0.279  |
| LSR                           | 1.24 (1.21-1.27) | 1.21 (1.17-1.25) | 0.282  | 1.28 (1.26-1.31) | 1.26 (1.20-1.33)  | 0.671  |
| Fatty liver, % (n)            | 23.7 (58)        | 24.2 (31)        | 0.501  | 18.9 (61)        | 24.4 (11)         | 0.246  |
| PAFV, cm <sup>3</sup>         | 21.3 (20.1-22.5) | 24.7 (22.6-26.7) | 0.004  | 12.4 (11.8-13.0) | 15.9 (13.9-17.8)  | <0.001 |
| EFV, cm <sup>3</sup>          | 56.4 (52.0-60.8) | 65.1 (58.6-71.6) | 0.027  | 35.8 (33.6-38.0) | 44.0 (38.8-49.3)  | 0.010  |
| PaCFV, cm <sup>3</sup>        | 78.5 (74.3-82.8) | 85.6 (79.1-92.1) | 0.064  | 74.8 (71.2-78.4) | 91.0 (80.9-101.1) | 0.002  |
| <b>Laboratory parameters</b>  |                  |                  |        |                  |                   |        |
| FG, mmol/L                    | 5.70 (5.48-5.91) | 6.44 (5.94-6.93) | 0.002  | 5.59 (5.41-5.77) | 6.85 (5.99-7.71)  | <0.001 |
| HbA1c, %                      | 5.89 (5.78-6.00) | 6.35 (6.12-6.57) | <0.001 | 5.90 (5.83-5.98) | 6.38 (6.04-6.71)  | <0.001 |
| Triglyceride, mmol/L          | 2.14 (1.93-2.35) | 2.03 (1.83-2.23) | 0.495  | 1.75 (1.64-1.86) | 1.98 (1.60-2.36)  | 0.152  |
| HDL-C, mmol/L                 | 1.24 (1.20-1.29) | 1.16 (1.10-1.23) | 0.035  | 1.53 (1.49-1.58) | 1.42 (1.31-1.53)  | 0.087  |
| LDL-C, mmol/L                 | 2.97 (2.87-3.08) | 3.13 (2.94-3.32) | 0.111  | 3.27 (3.17-3.37) | 3.17 (2.91-3.44)  | 0.503  |

Data are presented as mean (95% confidence interval, CI) for continuous and % (numbers, n) for categorical characteristics.

Abbreviations: CAD-CA, coronary artery atherosclerosis; CADmsCA, CAD moderate to severe coronary atherosclerosis; CADmmCA, CAD minimal to mild coronary atherosclerosis; BMI, body mass index, kg/m<sup>2</sup>; WC, waist circumference, cm; VATA, visceral adipose tissue area, cm<sup>2</sup>; SATA, subcutaneous adipose tissue area, cm<sup>2</sup>; VATV, visceral adipose tissue volume, cm<sup>3</sup>; SATV, subcutaneous adipose tissue volume, cm<sup>3</sup>; LSR, liver-to-spleen attenuation ratio; PAFV, periaortic fat volume, cm<sup>3</sup>; EFV, epicardial fat volume, cm<sup>3</sup>; PaCFV, paracardial fat volume, cm<sup>3</sup>; SBP, systolic blood pressure, mmHg; FG, fast glucose, mmol/L; HbA1c, hemoglobin A1c, %; HDL-C, high-density lipoprotein cholesterol, mmol/L; LDL-C, low-density lipoprotein cholesterol, mmol/L.

**Supplement Figure 1. The representative sample images for body ectopic fat measurement.**

**1A**

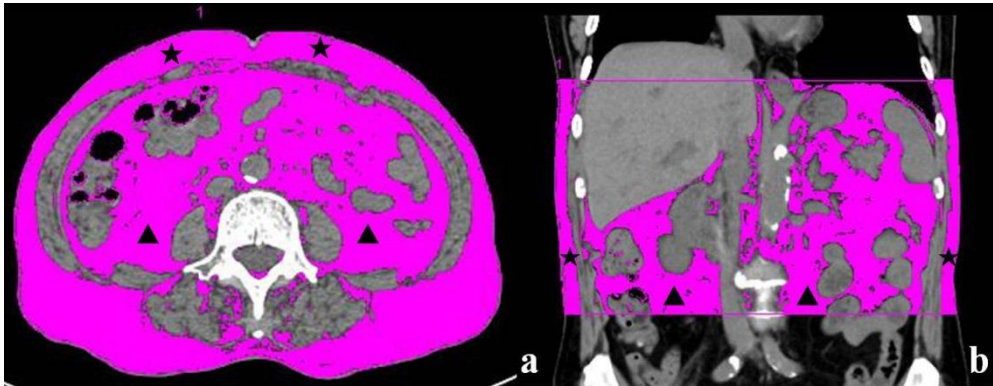

**1B**

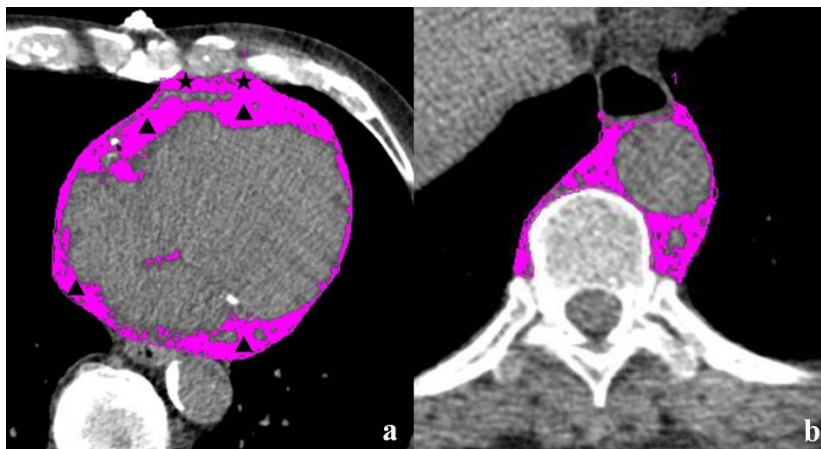

**1C**

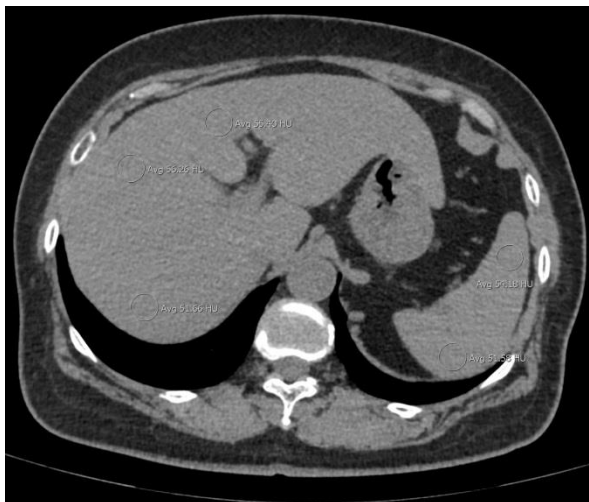

**Supplement Figure 1A.** Representative abdominal non-contrast-enhanced CT sample images for measurement a) visceral adipose tissue area (▲) and subcutaneous adipose tissue area (★); b) visceral adipose tissue volume (▲) and subcutaneous adipose tissue volume (★).

**1B:** Representative sample images for measurement a) epicardial fat volume (▲) and paracardial fat volume (★); b) periaortic fat volume.

**1C.** Representative sample images for measurement of fatty liver by liver and spleen attenuation in Hounsfield units.
